# Supplementary material
Source: Frontiers journal article supplement (https://www.frontiersin.org/articles/1605018)

**Supplementary Figure 1. PRISMA Flow Chart**

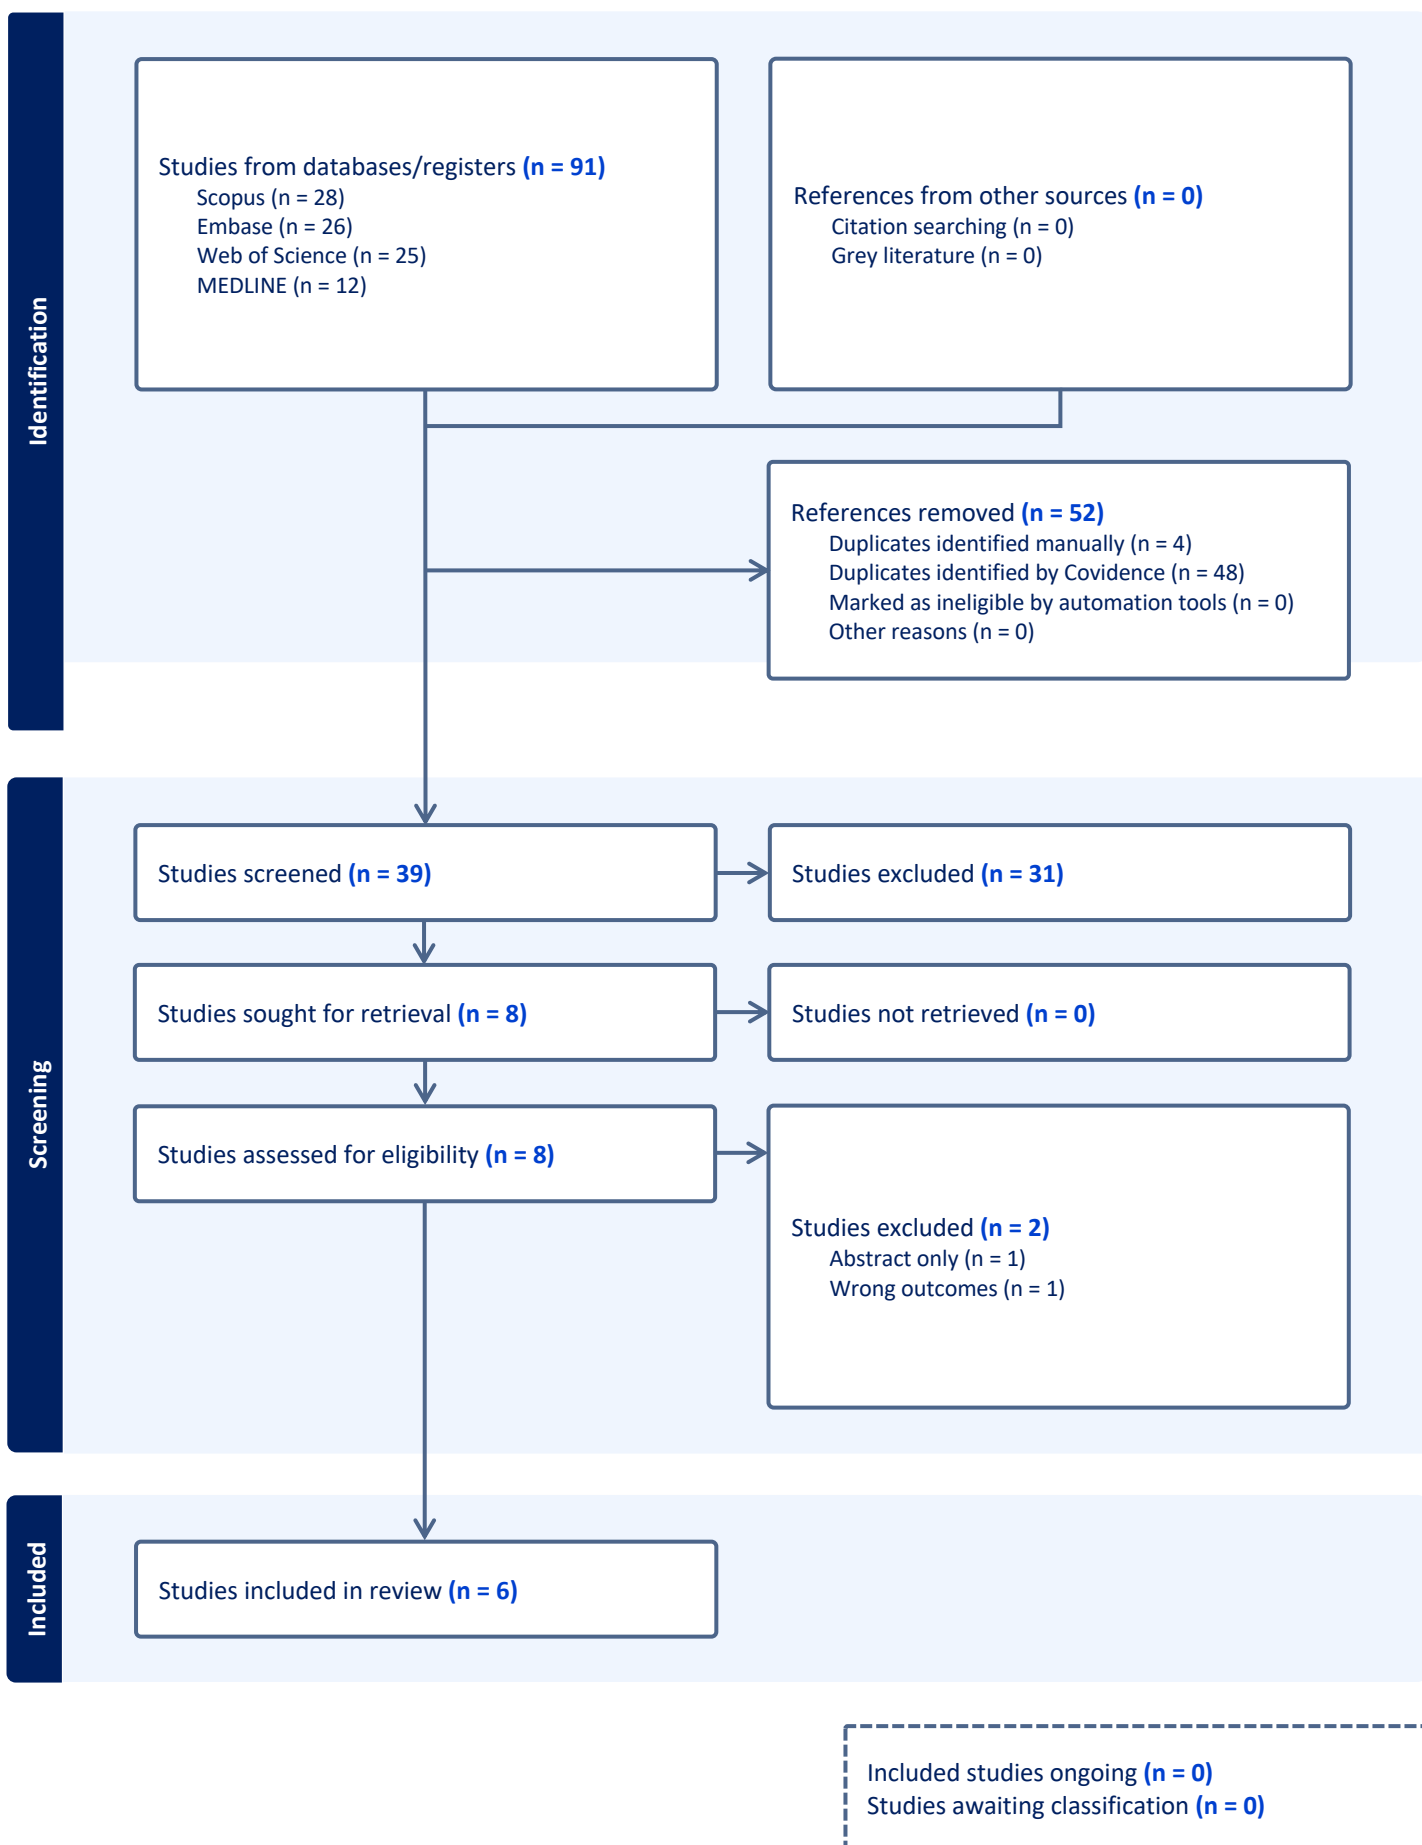

Supplement: Image_1.pdf [file Image_1.pdf]
